# Supplementary material
Source: ML conference proceedings conference paper supplement (https://openaccess.thecvf.com/content/ICCV2025/html/Tian_MMCR_Benchmarking_Cross-Source_ICCV_2025_paper.html)
Supplement: Supplementary file 1 [file Tian_MMCR_Benchmarking_Cross-Source_ICCV_2025_supplemental.pdf]

# Supplementary Materials of MMCR: Benchmarking Cross-Source Reasoning in Scientific Papers

## A. Benchmark Details

We appreciate the reviewer’s thoughtful comment on MMCR’s classification as a reasoning benchmark. We respectfully maintain that MMCR tests reasoning capabilities as it aligns with the reviewer’s cited definition of reasoning as ”multi-step/multi-hop question answering.” Our definition of ”cross-source reasoning” in MMCR refers to questions that require synthesizing information from multiple sources within scientific papers to derive answers that cannot be obtained from any single source alone.

Taking the question in Figure S.7 as an example, the reasoning process in MMCR directly parallels HotpotQA’s definition of ”inferring the bridge entity to complete the 2nd-hop question.” As illustrated in Figure S.7, answering MMCR questions typically requires first inferring which specific figure or table is being referenced through textual descriptions (e.g., ”the t-SNE visualization of CLIP encoding features”). This constitutes the first reasoning hop and establishes the critical bridge entity. Only after successfully identifying this bridge entity can the model proceed to the second hop, extracting relevant information from the identified sources and synthesizing it to derive the answer.

The reasoning complexity is further amplified by scientific papers’ high information density (19 pages average), input as pure images rather than OCR-processed text, and questions requiring numerical reasoning and calculations. The benchmark comprises scientific papers across seven academic subjects of artificial intelligence, with questions systematically categorized into ten distinct types based on their required evidence sources. The distribution of these categories is illustrated in Fig. S.1. Representative examples demonstrating each evidence type are presented in Figs. S.5 to S.14.

## B. Evaluation Details

### B.1. Evaluation Prompt

Figure S.2 presents the prompts with and without the use of Chain-of-Thought (CoT). For InternVL2.5, we employed the official CoT prompt released by the developers. For the remaining benchmark models—MiniCpm-o 2.6, Qwen2.5-VL, and Idefics3—we implemented a unified CoT prompt

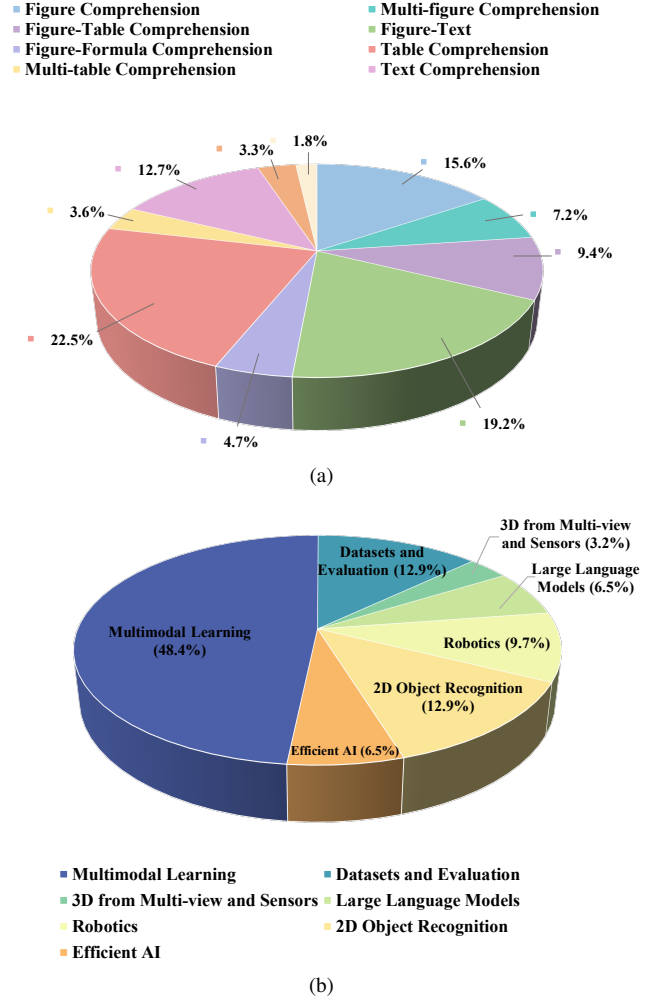

Figure S.1. Distribution of Questions by Evidence Types and Research Domains. (a) Percentage distribution across ten evidence source types. (b) Distribution across seven AI research subjects.

to ensure methodological consistency across experiments.

### Evaluation Prompts: CoT Prompt

#### CoT Prompt for InternVL-2.5:

“Your task is to answer the question below. Give step by step reasoning before you answer, and when you’re ready to answer, please use the format:

‘\Final answer: ... \’

Question: {question}”

#### CoT Prompt for MiniCpm-o 2.6, Qwen2.5-VL, Idedfics3:

“Carefully read the following multichoice question, solve it step by step and finally pick the option associated with the correct answer in the format of ‘Answer: Selected option.’”

#### w/o CoT Prompt:

“Please select the correct answer from the options above.”

Figure S.2. Evaluation Prompt

## B.2. Answer Option Inference Details for LLM Responses

### B.2.1. Implementation Details

Unlike existing benchmarks that employ LLM-based methods for open-ended response extraction, our benchmark utilizes a heuristic rule-based approach for multiple-choice answer inference.

The rule-based approach for multiple-choice answer inference comprises two stages: primary option-based inference, followed by text-based inference as a fallback strategy. Specifically, the option-based inference method counts the occurrence of option identifiers (A, B, C, etc.) in the response. A valid inference is made when exactly one option identifier is detected. When option-based inference fails, the text-based inference serves as a fallback mechanism. It converts both the model response and choice contents to lowercase before searching for exact matches of choice content within the response. This method succeeds only when precisely one choice content is found in the processed response.

This two-stage approach ensures robust answer extraction while maintaining high precision through strict matching criteria. When both methods fail to identify a unique answer, false will be returned to indicate inference failure.

### B.2.2. Existing Problems

The rule-based approach for multiple-choice answer inference offers efficiency by eliminating additional LLM calls. However, it occasionally fails to accurately extract responses despite correct model reasoning. We categorize

such cases as *Matching Errors*. As shown in Tab. S.1. The error distribution analysis demonstrates that extraction failures represent a negligible proportion of the total errors, with only two instances identified across all cases. Figure S.21 illustrates one representative example of such a Matching Error.

| Matching errors | Total error cases | Error Rate |
|-----------------|-------------------|------------|
| 2               | 109               | 1.8%       |

Table S.1. Example Distribution of Matching Errors in Response Extraction from GPT-4o. The table shows the proportion of matching errors among all error cases, demonstrating that extraction failures constitute only 1.8% of total errors identified in our evaluation.

## C. Extended Analysis

### C.1. Analysis of Error Cases

We conducted systematic error analysis of GPT-4o’s performance on our benchmark to investigate its limitations in cross-source reasoning within scientific papers. Through manual examination of 109 incorrect responses, we identified seven distinct error categories. A comprehensive analysis of all error categories, accompanied by representative examples, is presented in (Figs. S.15 to S.21).

### C.2. Performance Across Evidence Types

We analyze model performance across different evidence source types, with detailed results presented in Fig. S.3. The radar chart visualization demonstrates GPT-4o’s consistent superiority across most categories compared to the other five VLMs. Particularly in text comprehension tasks, both QwenVL-2.5-72B and GPT-4o achieve notable accuracy (68.57 and 65.71 respectively), likely benefiting from their extensive pretraining corpora.

However, substantial performance degradation is observed in cross-source integration tasks featured in MMCR, particularly in Figure-Text Comprehension, Figure-Table Comprehension, and Multi-Figure Comprehension, where the majority of VLMs achieve accuracy scores below 50. The pronounced disparity between single-source and cross-source task performance reveals a fundamental limitation: while MLLMs exhibit proficiency in individual modality processing, they demonstrate reduced effectiveness in tasks requiring synthesis of information from heterogeneous sources.

### C.3. Annotation requirements

Before initiating the formal annotation process, a systematic taxonomy of task types and subject domains was established. This methodological framework ensures annotation

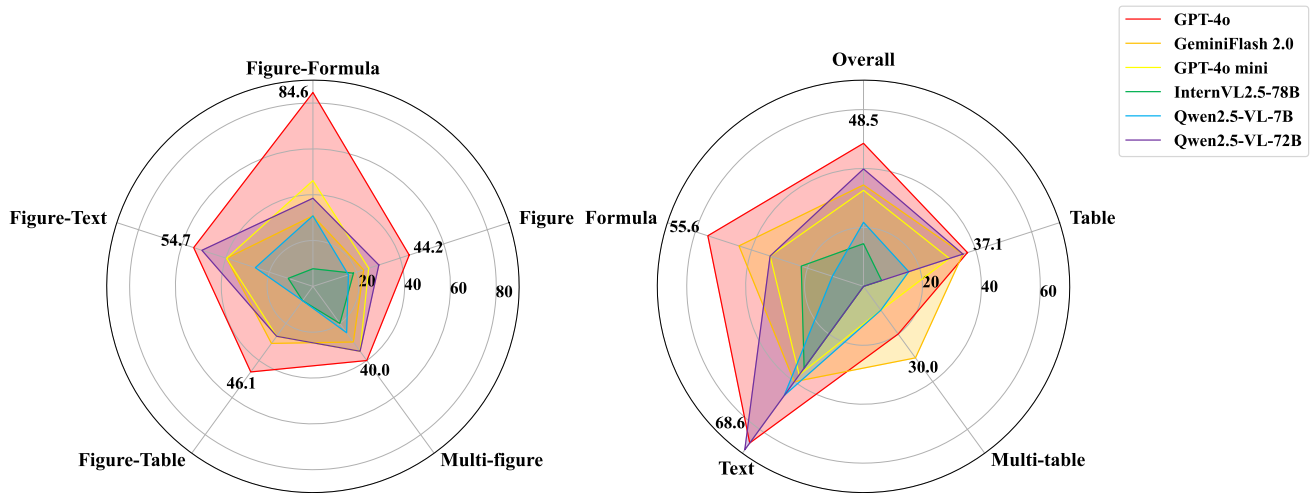

Figure S.3. Fine-grained results on various evidence source types.

consistency and maintains rigorous quality standards across the dataset construction process. Rigorous quality control protocols were implemented throughout the annotation process to establish a robust benchmark for evaluating the comprehensive capabilities of VLMs. Question formulation followed a structured protocol that integrates document-specific content with domain knowledge requirements, establishing a rigorous framework for in-depth assessment of scientific paper comprehension. The questions in MMCR are designed to evaluate comprehensive document understanding, specifically focusing on cross-source reasoning capabilities. The detailed evaluation requirements are illustrated in Fig. S.4.

#### C.4. Annotation process

The annotation process was conducted by expert annotators, who underwent comprehensive training to ensure annotation consistency and quality standards. The standardized training protocol comprised several systematic phases: 1) **Initial standardization:** The project leader provided annotated sample papers to the annotators, which were subject to multiple rounds of verification. This iterative process ensured that the annotators fully understood the expectations and standards required for the annotation. 2) **Domain-specific allocation:** Annotators were assigned to subject domains aligned with their primary research expertise, selecting one to two domains from predefined categories. Within each domain, five representative publications were systematically identified for annotation. This domain-specific allocation ensures optimal alignment between expert knowledge and content analysis, maintaining annotation quality and disciplinary rigor. 3) **Quality assurance:** Completed annotations underwent systematic re-

view by the project coordinator to ensure adherence to established protocols. When deviations from annotation standards were identified, annotators received structured feedback and supplementary training for remediation. This iterative quality assurance process continued until all annotations achieved compliance with predetermined quality benchmarks. 4) **Supplementary annotation:** In the final phase, expert annotators conducted supplementary annotation rounds in accordance with established protocols to expand the dataset while maintaining consistency standards.

### Examples for Annotation Requirements

**Requirement I:**

“The question is specifically designed to examine the cross-source reasoning ability of the model in scientific papers, and it must be correctly derived exclusively from the designated information source, not from any additional information source. Annotators must strictly adhere to this requirement.”

**Requirement II:**

“In order to mitigate the risk of the model relying exclusively on prior knowledge to generate responses, the annotated questions and answers were meticulously structured to ensure that accurate responses could only be derived by synthesizing information distributed across multiple pages of the document. This approach prevents the model from bypassing the intended reasoning process and reduces the potential for information leakage or unintended biases that might arise from relying on external knowledge.”

**Requirement III:**

“To further ensure that the model genuinely comprehends the content of each paper, at least eight questions were annotated for every paper. This requirement was set to ensure a robust and comprehensive evaluation of the model’s understanding across a variety of aspects within each paper.”

Figure S.4. Annotation requirements



## Figure Comprehension

### Document Thumbnail

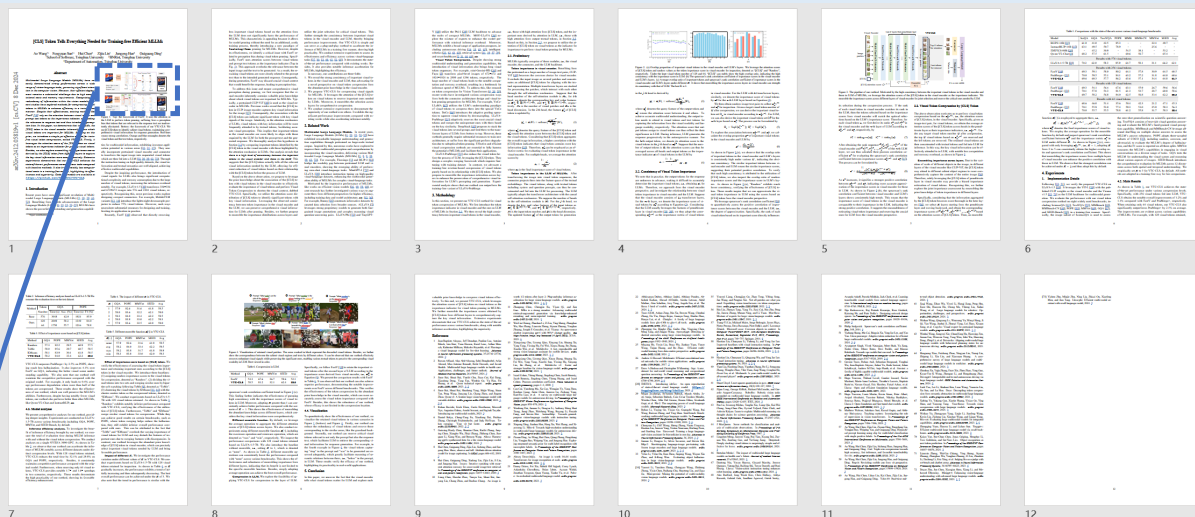

**Question:** In the comparative illustration of the FastV and VTC-CLS frameworks, what specific colors are used to represent vision tokens and text tokens, respectively?

**Evidence:**

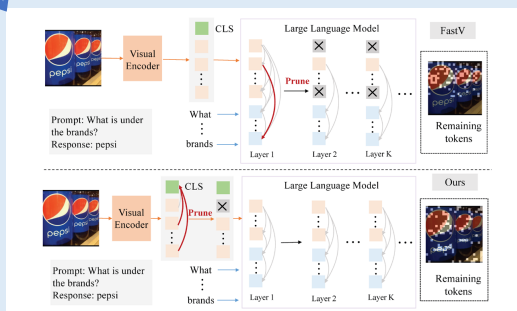

- A. Green and light orange.
- B. Light orange and light blue.
- C. Green and light blue.
- D. Gray and light blue.
- E. Light blue and light orange.

**Ground Truth:** B. Light orange and light blue.

Figure S.5. The demo of figure comprehension.

## Multi-figure Comprehension

### Document Thumbnail:

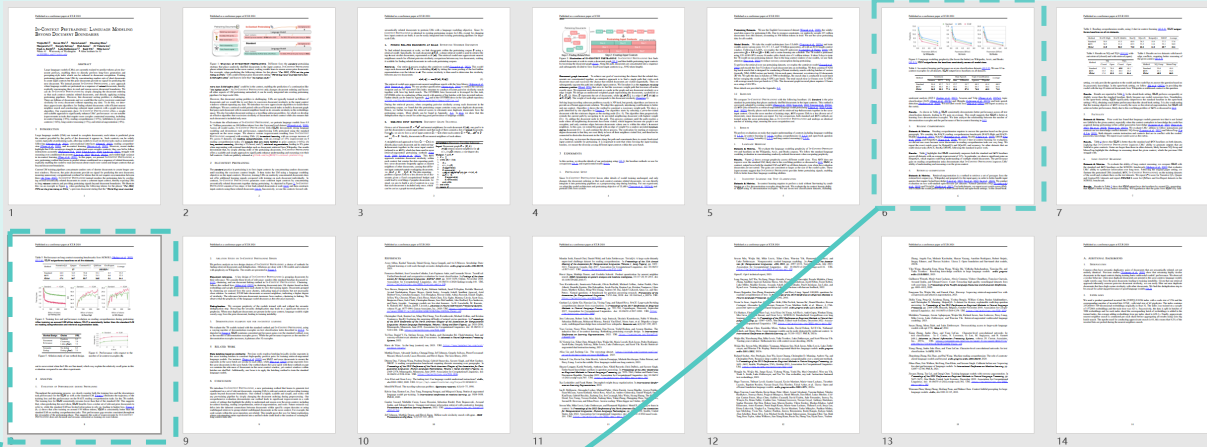

### Evidence:

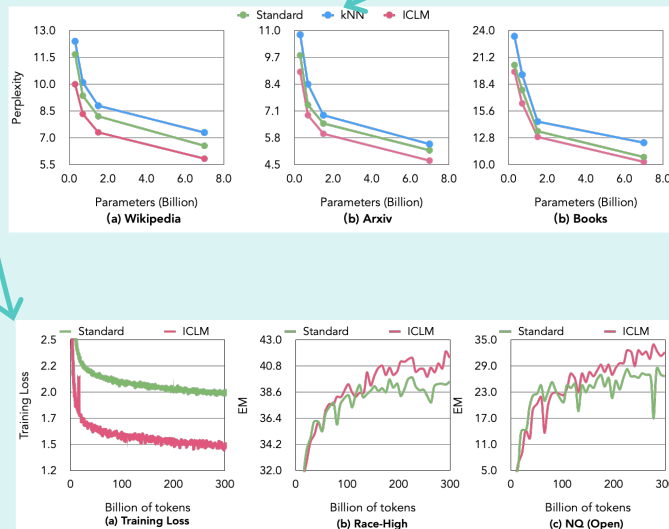

**Question:** Which of the following methods is consistently represented in both the language modeling perplexity charts across multiple datasets and the training loss and performance evolution graphs for reading comprehension during pretraining?

- A. Standard and kNN.
- B. ICLM and Standard.
- C. ICLM and kNN.
- D. Standard, kNN and ICLM.
- E. Only ICLM.

**Ground Truth:** B. ICLM and Standard.

Figure S.6. The demo of multi-figure comprehension.

## Figure-Table Comprehension

### Document Thumbnail:

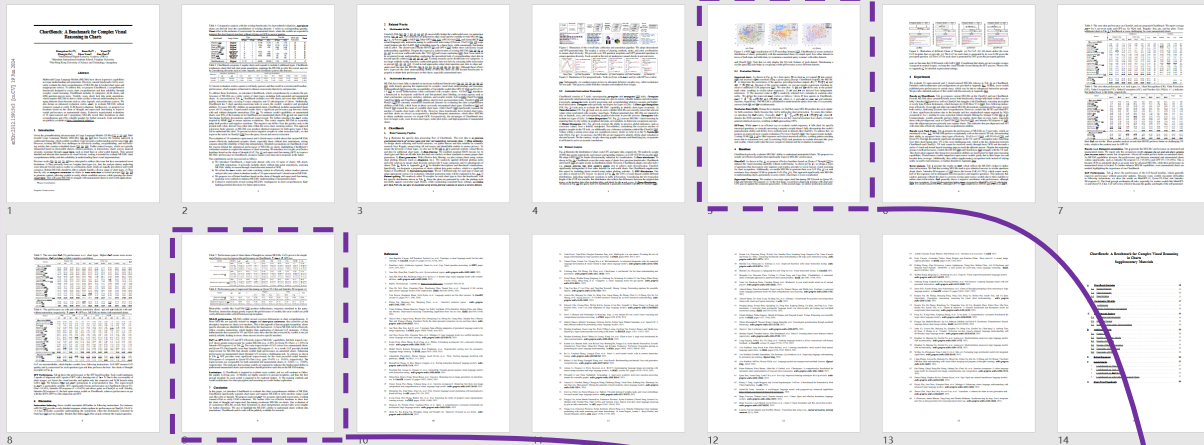

**Question:** In the t-SNE visualization of CLIP encoding features for Chart type data, what color represents the dataset that achieves the highest average score(75.76) among open-source MLLMs in the zero-shot performance comparison table?

- A. Light green.
- B. Yellow.
- C. Orange.
- D. Light blue.
- E. Purple..

**Ground Truth:** B. Yellow.

### Evidence:

| Models                     | ChartBench   |       |       |            |       |       | ChartQA |      |       |       |       |     |
|----------------------------|--------------|-------|-------|------------|-------|-------|---------|------|-------|-------|-------|-----|
|                            | Regular Type |       |       | Extra Type |       |       | Avg     | Rank | Human | Avg   | Rank  |     |
|                            | Acc+         | NQA   | Avg   | Acc+       | NQA   | Avg   |         |      |       |       |       |     |
| Open source MLLMs          |              |       |       |            |       |       |         |      |       |       |       |     |
| VisualGLM [20]             | 3.46         | 1.83  | 3.34  | 4.22       | 4.84  | 4.35  | 3.68    | #18  | 18.96 | 6.80  | 12.88 | #12 |
| Shikru [13]                | 8.59         | 2.35  | 7.34  | 7.50       | 9.05  | 7.81  | 7.55    | #17  | 16.24 | 7.28  | 11.76 | #15 |
| OneChart [10]              | 12.34        | 2.26  | 10.33 | 8.75       | 3.37  | 7.68  | 9.13    | #16  | 85.30 | 49.10 | 67.20 | #5  |
| InstructBLIP [17]          | 17.96        | 0.87  | 14.55 | 5.50       | 5.37  | 5.47  | 10.43   | #15  | 15.92 | 7.92  | 11.92 | #14 |
| ChartVLM [74]              | 8.02         | 43.74 | 15.24 | 5.92       | 18.21 | 8.37  | 12.06   | #14  | 42.08 | 82.48 | 62.28 | #6  |
| Interlin-XComposer [82]    | 19.70        | 1.22  | 16.01 | 10.11      | 5.79  | 9.25  | 12.94   | #13  | 13.20 | 7.84  | 10.52 | #16 |
| CogVLM-Chat [70]           | 14.41        | 12.96 | 14.12 | 11.89      | 13.68 | 12.25 | 13.26   | #12  | 34.24 | 28.56 | 31.40 | #9  |
| SPHINX [41]                | 17.87        | 6.17  | 15.54 | 17.92      | 12.74 | 16.89 | 16.13   | #11  | 21.44 | 11.20 | 16.32 | #11 |
| BLIP2 [38]                 | 21.65        | 0.96  | 17.53 | 18.44      | 4.84  | 15.74 | 16.70   | #10  | 13.52 | 6.00  | 9.76  | #17 |
| CogAgent [27]              | 20.39        | 26.61 | 21.63 | 14.36      | 25.79 | 16.64 | 21.35   | #9   | 54.08 | 80.56 | 67.32 | #4  |
| MiniGPT-v2 [12]            | 22.37        | 2.43  | 18.40 | 25.06      | 5.26  | 21.11 | 19.63   | #8   | 15.60 | 8.48  | 12.04 | #13 |
| ChartLlama [26]            | 22.02        | 16.87 | 21.00 | 22.56      | 18.32 | 21.71 | 21.50   | #7   | 58.40 | 93.12 | 75.76 | #1  |
| mPLUG-Owl-bloomz [78]      | 27.80        | 2.35  | 22.73 | 25.47      | 6.21  | 21.64 | 22.21   | #6   | 7.84  | 4.88  | 6.36  | #18 |
| LLaVA-v1.5 [46]            | 25.61        | 8.09  | 22.12 | 27.39      | 15.26 | 24.97 | 23.39   | #5   | 22.64 | 13.04 | 17.84 | #10 |
| Qwen-VL-Chat [4]           | 29.46        | 23.57 | 28.28 | 26.56      | 21.05 | 25.46 | 26.98   | #4   | 42.48 | 75.20 | 58.84 | #7  |
| DocOwl-v1.5 [29]           | 35.27        | 37.30 | 35.67 | 26.86      | 29.47 | 27.38 | 31.89   | #3   | 48.24 | 86.72 | 67.48 | #8  |
| Mini-Gemini [40]           | 39.57        | 25.57 | 36.78 | 31.81      | 25.79 | 30.61 | 33.96   | #2   | 44.32 | 57.04 | 50.68 | #13 |
| Interlin-XComposer-v2 [19] | 57.89        | 40.96 | 54.52 | 41.75      | 31.58 | 39.73 | 47.78   | #1   | 63.12 | 81.92 | 72.64 | #2  |
| Closed source MLLMs        |              |       |       |            |       |       |         |      |       |       |       |     |
| ERNIE [5]                  | 47.39        | 25.74 | 43.08 | 46.39      | 33.37 | 43.82 | 43.37   | #3   | -     | -     | -     | -   |
| GPT-4V [34]                | 53.26        | 33.04 | 49.23 | 55.83      | 40.00 | 52.68 | 50.74   | #2   | -     | -     | 78.50 | #2  |
| GPT-4O [54]                | 65.00        | 40.00 | 60.02 | 63.33      | 41.05 | 58.89 | 59.45   | #1   | -     | -     | 85.70 | #1  |

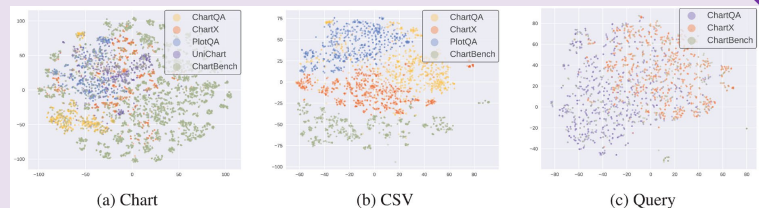

Figure S.7. The demo of figure-table comprehension.

## Figure-Text Comprehension

### Document Thumbnail:

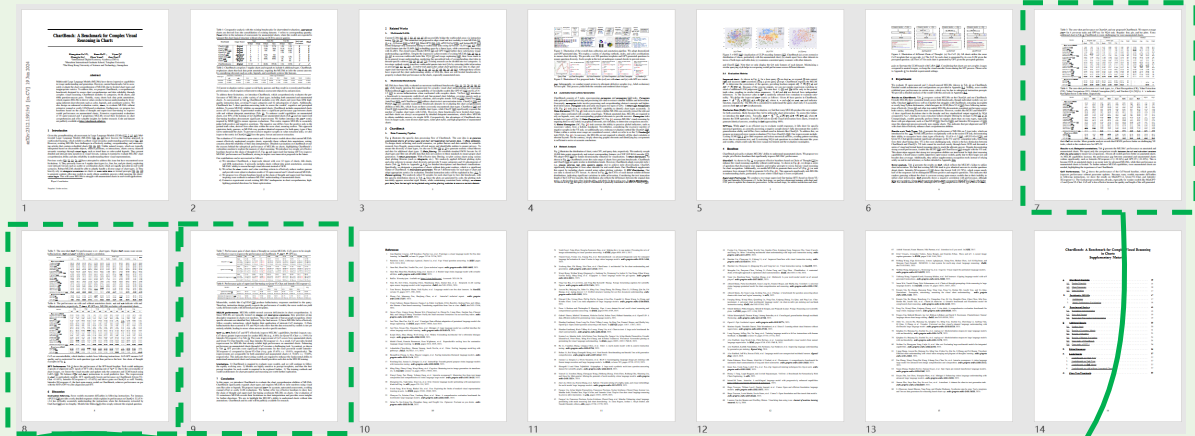

**Question:** Based on the analysis presented in the corresponding paragraph, which combination in the illustration of different chain of thought examples, demonstrates the highest and lowest performance, respectively?

### Evidence:

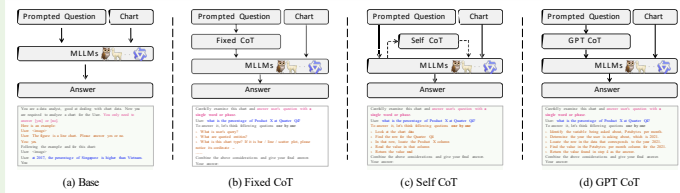

**CoT Performance.** Tab. 7 shows the performance of the CoT-based baseline, which generally improves performance without parameter updates. Because many models encounter difficulties in following instructions, we show the results on MiniGPT-v2, Qwen-VL-Chat, and Internlm-XComposer-v2. The fixed prompt ameliorates all tasks, especially for weaker models like MiniGPT-v2 and Qwen-VL-Chat. CoT-self is less effective because the quality and length of the self-generated CoT are uncontrollable, which hinders models from following instructions. CoT-GPT ensures CoT quality and is customized for each question type and thus performs the best. See chain of thought examples in Fig. 4.

- A. The second one from the left and the third one from the left.
- B. The second one from the left and the rightmost one.
- C. The third one from the left and the rightmost one.
- D. The rightmost one and the third one from the left.
- E. The rightmost one and the second one from the left.

**Ground Truth:** D. The rightmost one and the third one from the left.

Figure S.8. The demo of figure-text comprehension.

## Figure-Formula Comprehension

### Document Thumbnail:

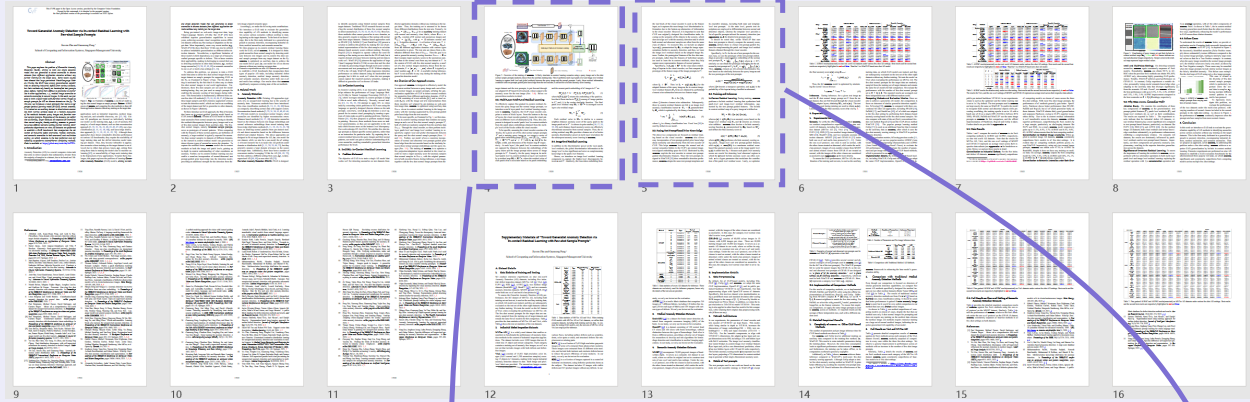

**Question:** Which colored rectangular volume in the InCTRL architecture are utilized to compute  $s_a(x)$  (i.e. the probability of the input  $x$  being classified as abnormal)?

- A. Green and light orange.
- B. Pale blue and light orange.
- C. Light orange and yellow.
- D. Pale blue and green.
- E. Pale red and light purple.

**Ground Truth:** E. Pale red and light purple.

### Evidence:

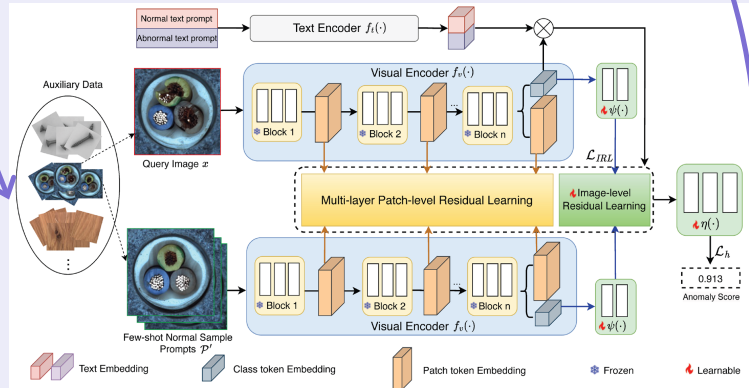

$$s_a(x) = \frac{\exp(F_a^T f_v(x))}{\exp(F_n^T f_v(x)) + \exp(F_a^T f_v(x))}$$

Figure S.9. The demo of figure-formula comprehension.



## Table Comprehension

### Document Thumbnail:

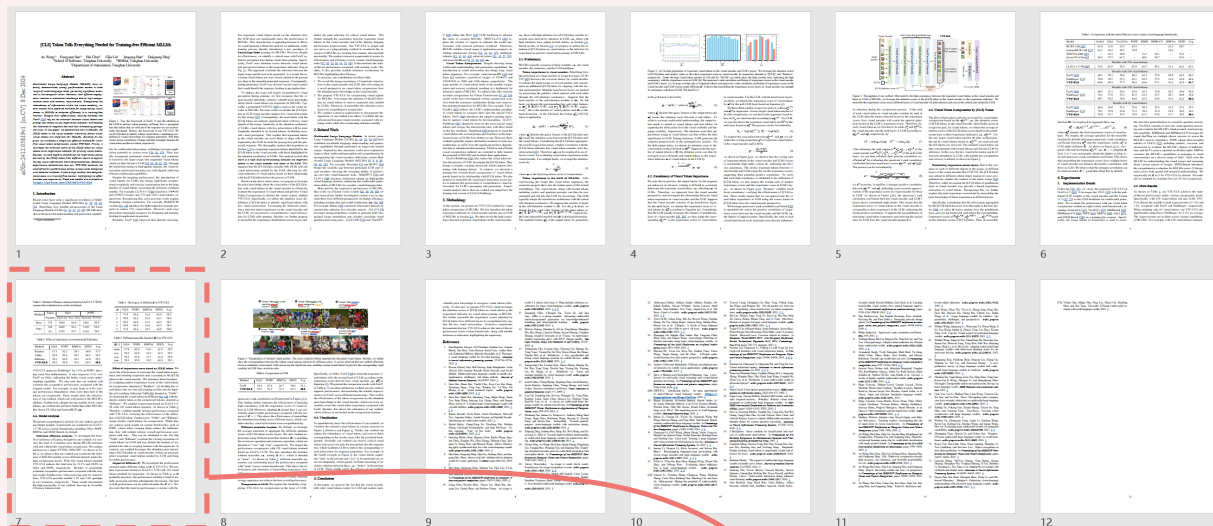

**Question:** Among the various ensemble functions adapted in the VTC-CLS method, which one exhibits the best performance on the GQA benchmark?

### Evidence:

- A. "Median."
- B. "Max."
- C. "Min."
- D. "None."
- E. "Avg."

Table 5. Different ensemble function  $E(\cdot)$  in VTC-CLS.

| $E(\cdot)$ | GQA  | POPE | MMVet | SEED | Avg  |
|------------|------|------|-------|------|------|
| none       | 57.9 | 82.6 | 31.6  | 61.8 | 58.5 |
| avg        | 58.2 | 84.0 | 33.4  | 62.2 | 59.5 |
| max        | 58.2 | 83.8 | 31.7  | 61.8 | 58.9 |
| min        | 58.3 | 83.8 | 33.0  | 62.0 | 59.3 |

**Ground Truth:** C. "Min."

Figure S.10. The demo of table comprehension.

## Multi-table Comprehension

### Document Thumbnail:

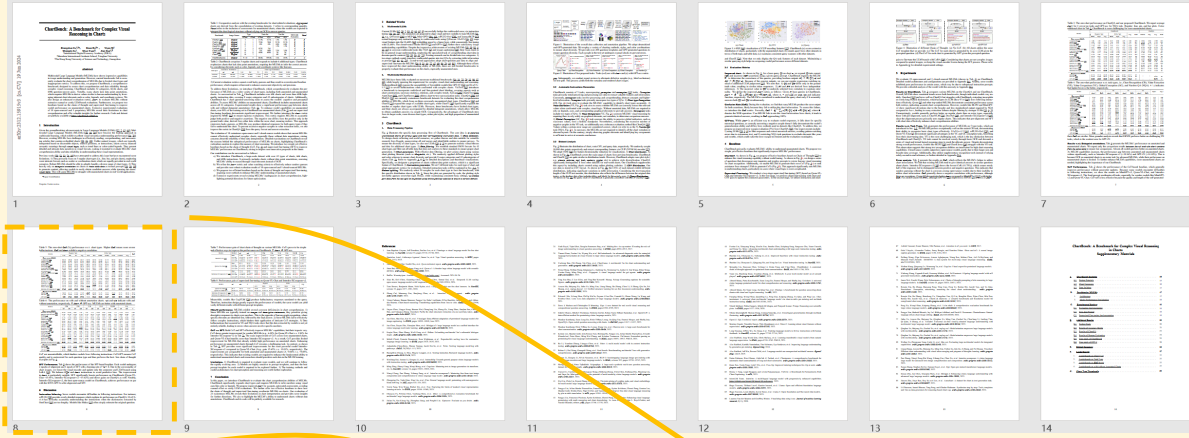

**Question:** In Table 3, what is the average score rank on ChartBench for the open-source MLLM which demonstrates the lowest NQA score among its peers in Table 4?

- A. #18.
- B. #16.
- C. #10.
- D. #12.
- E. #17.

**Ground Truth:** C. #10.

### Evidence:

Table 3: The zero-shot performance on ChartQA and our proposed ChartBench. We report average *Acc+* for 4 yes-or-no tasks and GPT-acc for NQA task. Regular: line, pie, and bar plots. Extra: additional chart in Tab 2. ChartBench is more challenging for more unannotated charts.

| Models                     | ChartBench   |              |              |              |              |              | ChartQA      |      |              |              |              |     |
|----------------------------|--------------|--------------|--------------|--------------|--------------|--------------|--------------|------|--------------|--------------|--------------|-----|
|                            | Regular Type |              |              | Extra Type   |              |              | Avg          | Rank | Human        | Avg          | Rank         |     |
|                            | Acc+         | NQA          | Avg          | Acc+         | NQA          | Avg          |              |      |              |              |              |     |
| Open source MLLMs          |              |              |              |              |              |              |              |      |              |              |              |     |
| VisualGLM [20]             | 3.46         | 1.83         | 3.13         | 4.22         | 4.84         | 4.35         | 3.68         | #18  | 18.96        | 6.80         | 12.88        | #12 |
| Shikra [13]                | 8.59         | 2.35         | 7.34         | 7.50         | 9.05         | 7.81         | 7.55         | #17  | 16.24        | 7.28         | 11.76        | #15 |
| OneChart [10]              | 12.34        | 2.26         | 10.33        | 8.75         | 3.37         | 7.68         | 9.12         | #16  | <b>85.30</b> | 49.10        | 67.20        | #5  |
| InstructBLIP [17]          | 17.96        | 0.87         | 14.55        | 5.50         | 5.37         | 5.47         | 10.43        | #15  | 15.92        | 7.92         | 11.92        | #14 |
| ChartVLM [74]              | 8.02         | <b>43.74</b> | 15.24        | 5.92         | 18.21        | 8.37         | 12.06        | #14  | 42.08        | 82.48        | 62.28        | #6  |
| InternLM-XComposer [82]    | 19.70        | 1.22         | 16.01        | 10.11        | 7.99         | 9.25         | 12.94        | #13  | 13.20        | 7.84         | 10.52        | #16 |
| CogVLM-Chat [70]           | 14.41        | 12.96        | 14.12        | 11.89        | 13.68        | 12.25        | 13.26        | #12  | 34.24        | 28.56        | 31.40        | #9  |
| SPHINX [41]                | 17.87        | 6.17         | 15.54        | 17.92        | 12.74        | 16.89        | 16.13        | #11  | 21.44        | 11.20        | 16.32        | #11 |
| BLIP2 [38]                 | 21.65        | 0.96         | 17.53        | 18.44        | 4.84         | 15.74        | 16.70        | #10  | 13.52        | 6.00         | 9.76         | #17 |
| CogAgent [27]              | 20.39        | 26.61        | 21.63        | 14.36        | 25.79        | 16.64        | 19.35        | #9   | 54.08        | 80.56        | 67.32        | #4  |
| MiniGPT-v2 [12]            | 22.37        | 2.43         | 18.40        | 25.06        | 5.26         | 21.11        | 19.61        | #8   | 15.60        | 8.48         | 12.04        | #13 |
| ChartLlama [26]            | 22.02        | 16.87        | 21.00        | 22.56        | 18.32        | 21.71        | 21.30        | #7   | 58.40        | <b>93.12</b> | <b>75.76</b> | #1  |
| mPLUG-Owl-bloomz [78]      | 27.80        | 2.35         | 22.73        | 25.47        | 6.21         | 21.64        | 22.21        | #6   | 7.84         | 4.88         | 6.36         | #18 |
| LLaVA-v1.5 [46]            | 25.61        | 8.09         | 22.12        | 27.39        | 15.26        | 24.97        | 23.39        | #5   | 22.64        | 13.04        | 17.84        | #10 |
| Qwen-VL [4]                | 29.46        | 23.57        | 28.28        | 26.56        | 21.05        | 25.46        | 26.98        | #4   | 42.48        | 75.20        | 58.84        | #7  |
| DocOwl-v1.5 [29]           | 35.27        | 37.30        | 35.67        | 26.86        | 29.47        | 27.38        | 31.89        | #3   | 48.24        | 86.72        | 67.48        | #3  |
| Mini-Gemini [40]           | 39.57        | 25.57        | 36.78        | 31.81        | 25.79        | 30.61        | 33.96        | #2   | 44.32        | 57.04        | 50.68        | #8  |
| InternLM-XComposer-v2 [19] | <b>57.89</b> | <b>40.96</b> | <b>54.52</b> | <b>41.75</b> | <b>31.58</b> | <b>39.73</b> | <b>47.78</b> | #1   | 63.12        | 81.92        | 72.64        | #2  |
| Closed source MLLMs        |              |              |              |              |              |              |              |      |              |              |              |     |
| ERNIE [5]                  | 47.39        | 25.74        | 43.08        | 46.39        | 33.37        | 43.82        | 43.37        | #3   | -            | -            | -            | -   |
| GPT-4V [54]                | 53.26        | 33.04        | 49.23        | 55.83        | 40.00        | 52.68        | 50.74        | #2   | -            | -            | 78.50        | #2  |
| GPT-4o [54]                | <b>65.00</b> | <b>40.00</b> | <b>60.02</b> | <b>63.33</b> | <b>41.05</b> | <b>58.89</b> | <b>59.45</b> | #1   | -            | -            | <b>85.70</b> | #1  |

Table 4: The zero-shot performance w.r.t. task types, i.e., Chart Recognition (CR), Value Extraction (VE), Value Comparison (VC), Global Conception (GC), and Number QA (NQA).  $\uparrow / \downarrow$  indicates that higher/lower is the better, respectively.

| Models                     | CR                    |                  | VE                    |                  | VC                    |                  | GC                    |                  | NQA $\uparrow$ | Avg. $\uparrow$ |
|----------------------------|-----------------------|------------------|-----------------------|------------------|-----------------------|------------------|-----------------------|------------------|----------------|-----------------|
|                            | <i>Acc</i> $\uparrow$ | CoR $\downarrow$ |                |                 |
| Open source MLLMs          |                       |                  |                       |                  |                       |                  |                       |                  |                |                 |
| VisualGLM [20]             | 16.29                 | 79.19            | 0.00                  | 99.67            | 0.00                  | 99.81            | 0.00                  | 99.71            | 3.19           | 3.68            |
| Shikra [13]                | 2.10                  | 93.57            | 11.90                 | 80.71            | 10.62                 | 87.71            | 7.86                  | 82.71            | 5.38           | 7.55            |
| OneChart [10]              | 3.71                  | 94.33            | 15.48                 | 82.14            | 17.57                 | 73.71            | 11.38                 | 85.67            | 2.76           | 9.12            |
| InstructBLIP [17]          | 49.57                 | 36.67            | 0.00                  | 100.00           | 0.05                  | 99.81            | 0.00                  | 99.90            | 2.90           | 10.43           |
| ChartVLM [74]              | 0.00                  | 100.00           | 9.05                  | 85.48            | 10.05                 | 83.81            | 8.52                  | 86.19            | 32.19          | 12.06           |
| InternLM-XComposer [82]    | 42.29                 | 56.95            | 6.86                  | 85.14            | 2.48                  | 96.57            | 9.67                  | 78.48            | 3.29           | 12.94           |
| CogVLM-1.5 [64]            | 29.14                 | 69.33            | 2.81                  | 94.29            | 14.19                 | 80.71            | 7.33                  | 90.14            | 13.29          | 13.26           |
| SPHINX [41]                | 38.48                 | 51.38            | 10.38                 | 80.67            | 14.33                 | 77.38            | 9.62                  | 80.90            | 9.14           | 16.13           |
| BLIP2 [38]                 | 60.05                 | 37.05            | 4.24                  | 89.29            | 14.05                 | 78.86            | 3.86                  | 90.00            | 2.71           | 16.70           |
| MiniGPT-v2 [12]            | 29.05                 | 49.24            | 22.00                 | 55.14            | 24.29                 | 53.33            | 18.10                 | 61.76            | 3.71           | 19.35           |
| CogAgent [27]              | 62.57                 | 37.10            | 1.19                  | 94.90            | 7.33                  | 88.24            | 1.19                  | 94.76            | 26.24          | 19.61           |
| ChartLlama [26]            | 49.86                 | 44.19            | 8.38                  | 84.14            | 20.43                 | 69.48            | 10.67                 | 83.81            | 17.52          | 21.30           |
| mPLUG-Owl-bloomz [78]      | 32.33                 | 51.24            | 23.14                 | 76.76            | 25.33                 | 69.29            | 26.48                 | 71.00            | 4.10           | 22.21           |
| LLaVA-v1.5 [46]            | 47.86                 | 36.24            | 15.81                 | 66.24            | 26.05                 | 56.48            | 16.52                 | 57.57            | 11.33          | 23.39           |
| Qwen-VL-Chat [4]           | 51.67                 | 42.71            | 11.14                 | 84.57            | 27.29                 | 63.14            | 21.71                 | 74.86            | 22.43          | 26.98           |
| DocOwl-v1.5 [29]           | 30.43                 | 65.05            | 34.48                 | 58.24            | 31.10                 | 55.19            | 30.48                 | 63.19            | 33.76          | 31.89           |
| Mini-Gemini [40]           | 80.52                 | 17.86            | 17.62                 | 70.43            | 26.00                 | 59.38            | 22.00                 | 71.10            | 25.67          | 33.96           |
| InternLM-XComposer-v2 [19] | 68.29                 | 30.24            | 36.63                 | 57.71            | 54.63                 | 27.71            | 45.80                 | 51.46            | 36.71          | 47.78           |
| Closed source MLLMs        |                       |                  |                       |                  |                       |                  |                       |                  |                |                 |
| ERNIE [5]                  | 65.24                 | 19.52            | 44.76                 | 44.76            | 32.86                 | 41.43            | 47.14                 | 47.62            | 29.24          | 43.37           |
| GPT-4V [54]                | 96.19                 | 2.86             | 30.95                 | 63.33            | 48.57                 | 34.76            | 46.19                 | 47.62            | 36.19          | 50.74           |
| GPT-4o [54]                | 97.62                 | 1.43             | 43.33                 | 44.76            | 66.19                 | 16.19            | 53.33                 | 41.43            | 40.48          | 59.45           |

Figure S.11. The demo of multi-table comprehension.



## Text Comprehension

### Document Thumbnail:

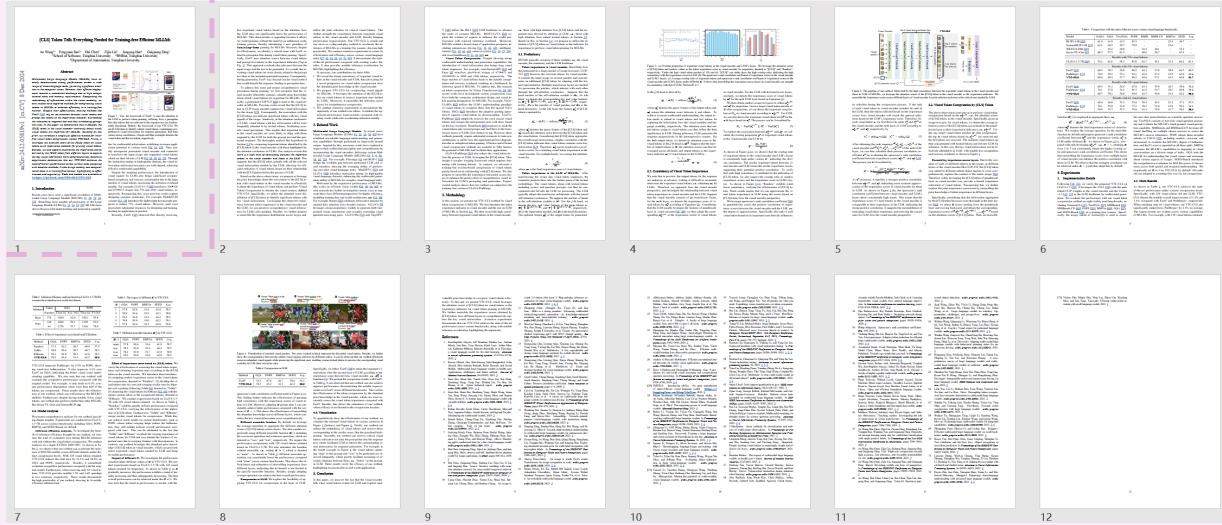

### Evidence:

Despite the inspiring performance, the introduction of visual signals for LLMs also brings significant computational complexity and memory consumption due to the large number of visual tokens, increasing the inference overhead notably. For example, LLaVA-1.5 [38] transforms  $336 \times 336$  and  $672 \times 672$  images into 576 and 2304 visual tokens, respectively. Recognizing this, some previous works explore designing compact connectors. For example, MobileVLM variants [13, 14] introduce the lightweight downsample projector to reduce 75% visual tokens. However, such ways necessitate substantial resources for designing and training, limiting its application in practice.

**Question:** Based on the discussion in the paper, which of the following accurately represents the limitations of MobileVLM variants?

- A. Requiring substantial resources for designing and training.
- B. Directly removing less important visual tokens based on the attention from the LLM.
- C. Overlooking the relevance between the input image and the text to be generated.
- D. Discarding crucial visual context that would benefit the response.
- E. Demonstrating limited adaptability to diverse visual input formats and resolutions.

**Ground Truth:** A. Requiring substantial resources for designing and training.

Figure S.12. The demo of text comprehension.

## Formula Comprehension

### Document Thumbnail:

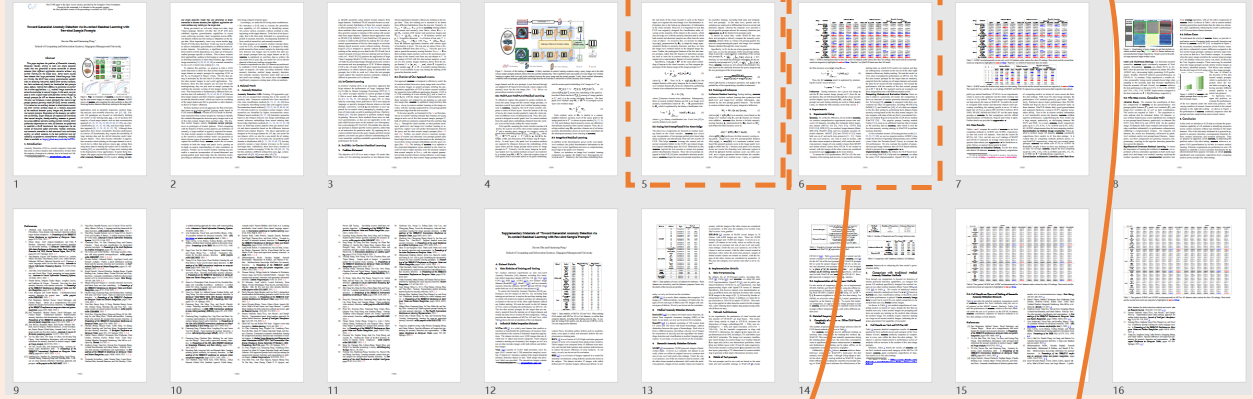

**Question:** In the inference process, which numbered equation describes how the final anomaly score is computed for a given test image  $x_t$ ?

### Evidence:

the final anomaly score  $s(x)$  using  $X_{train}$ :

$$\mathcal{L}_h = \frac{1}{N} \sum_{x \in X_{tr}} \mathcal{L}_b(s(x), y_x). \quad (9)$$

Thus, the full InCTRL model is optimized by minimizing the overall loss as follows:

$$\mathcal{L}_{InCTRL} = \mathcal{L}_{IRL} + \mathcal{L}_h. \quad (10)$$

**Inference.** During inference, for a given test image  $x_t$  and the  $K$ -shot normal image prompt set  $\mathcal{P}$  from the target dataset, they are fed forward through the visual encoder and the adapter layers, obtaining  $\mathbf{M}_{x_t}$  and  $s_i(x_t)$ . The text prompt sets used during training are used to obtain  $s_a(x_t)$ . Lastly, we obtain the final anomaly score of  $x_t$  via Eq. 8.

$$s_a(x) = \frac{\exp(\mathbf{F}_a^T f_v(x))}{\exp(\mathbf{F}_a^T f_v(x)) + \exp(\mathbf{F}_a^T f_v(x))}, \quad (6)$$

where  $[\cdot]^T$  denotes a transpose operation, and  $s_a(x)$  is the probability of the input  $x$  being classified as abnormal.

### 3.6. Training and Inference

**In-Context Residual Learning.** During training, InCTRL performs a holistic residual learning that synthesizes both patch-level and image-level residual information, augmented by the text prompt-guided features. The holistic in-context residual map of a query image  $x$  is defined as:

$$\mathbf{M}_x^+ = \mathbf{M}_x \oplus s_i(x) \oplus s_a(x), \quad (7)$$

where  $s_i(x) = \eta(\mathbf{F}_x; \Theta_\eta)$  is an anomaly score based on the image-level residual map  $\mathbf{F}_x$  and  $\oplus$  denotes an element-wise addition. InCTRL then devises a holistic anomaly scoring function  $\phi$ , parameterized by  $\Theta_\phi$ , based on  $\mathbf{M}_x^+$ , and defines the final anomaly score as:

$$s(x) = \phi(\mathbf{M}_x^+, \Theta_\phi) + \alpha s_p(x), \quad (8)$$

**Ground Truth:** C. Equation (8).

Figure S.13. The demo of formula comprehension.

## Pseudocode Comprehension

### Document Thumbnail:

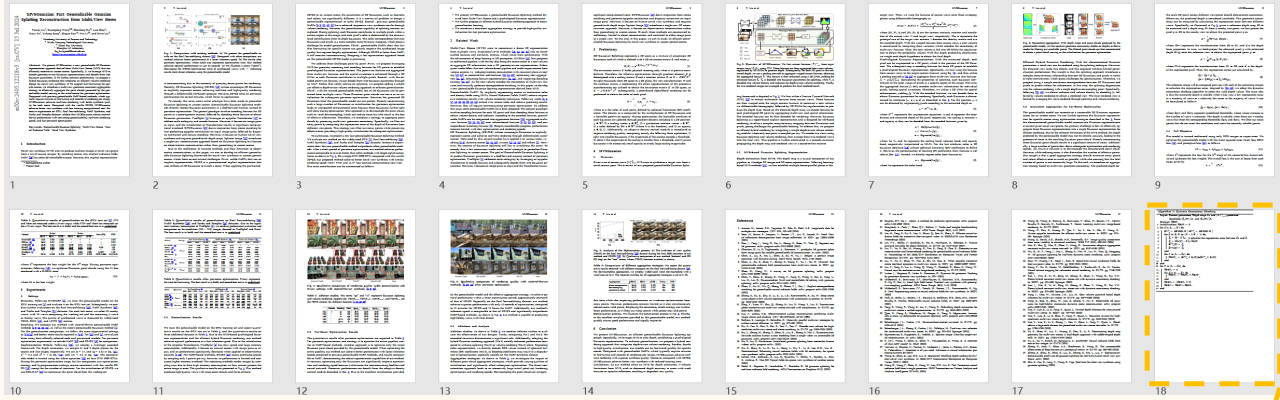

**Question:** How many steps are there in the Dynamic Consistency Checking algorithm?

- A. 21.
- B. 18.
- C. 24.
- D. 16.
- E. 20.

**Ground Truth:** A. 21.

### Evidence:

#### Algorithm 1: Dynamic Consistency Checking

**Input:** Camera parameters, Depth maps  $D_0$  and  $\{D_i\}_{i=1}^N$ , predefined thresholds  $\{\theta_p(n)\}_{n=1}^{N_\theta}$  and  $\{\theta_d(n)\}_{n=1}^{N_\theta}$

**Output:**  $Mask$

```

1 Initialization:  $Mask \leftarrow 0$ 
2 for  $i$  in  $(1, \dots, N)$  do
3    $Err_p^i \leftarrow zeros(H, W), Err_d^i \leftarrow zeros(H, W)$ 
4   for  $p$  in  $(0, 0)$  to  $(H - 1, W - 1)$  do
5      $\xi_p^i \leftarrow \|p - p'\|_2$ ,  $\triangleright$  calculate the reprojection error between  $D_0$  and  $D_i$ 
6      $\xi_d^i \leftarrow \|D_0(p) - d'\|_1 / D_0(p)$ 
7      $Err_p^i(p) \leftarrow \xi_p^i$ 
8      $Err_d^i(p) \leftarrow \xi_d^i$ 
9   end
10  for  $n$  in  $(1, \dots, N_\theta)$  do
11     $Mask_n^i \leftarrow (Err_p^i < \theta_p(n)) \& (Err_d^i < \theta_d(n))$ 
12  end
13 end
14 for  $n$  in  $(1, \dots, N_\theta)$  do
15    $Mask_n \leftarrow 0$ 
16   for  $i$  in  $(1, \dots, N)$  do
17      $Mask_n \leftarrow Mask_n + Mask_n^i$ 
18   end
19    $Mask_n \leftarrow (Mask_n > n)$ 
20    $Mask \leftarrow Mask \cup Mask_n$ 
21 end

```

Figure S.14. The demo of pseudocode comprehension.

## I. Hallucinated Evidence: Case

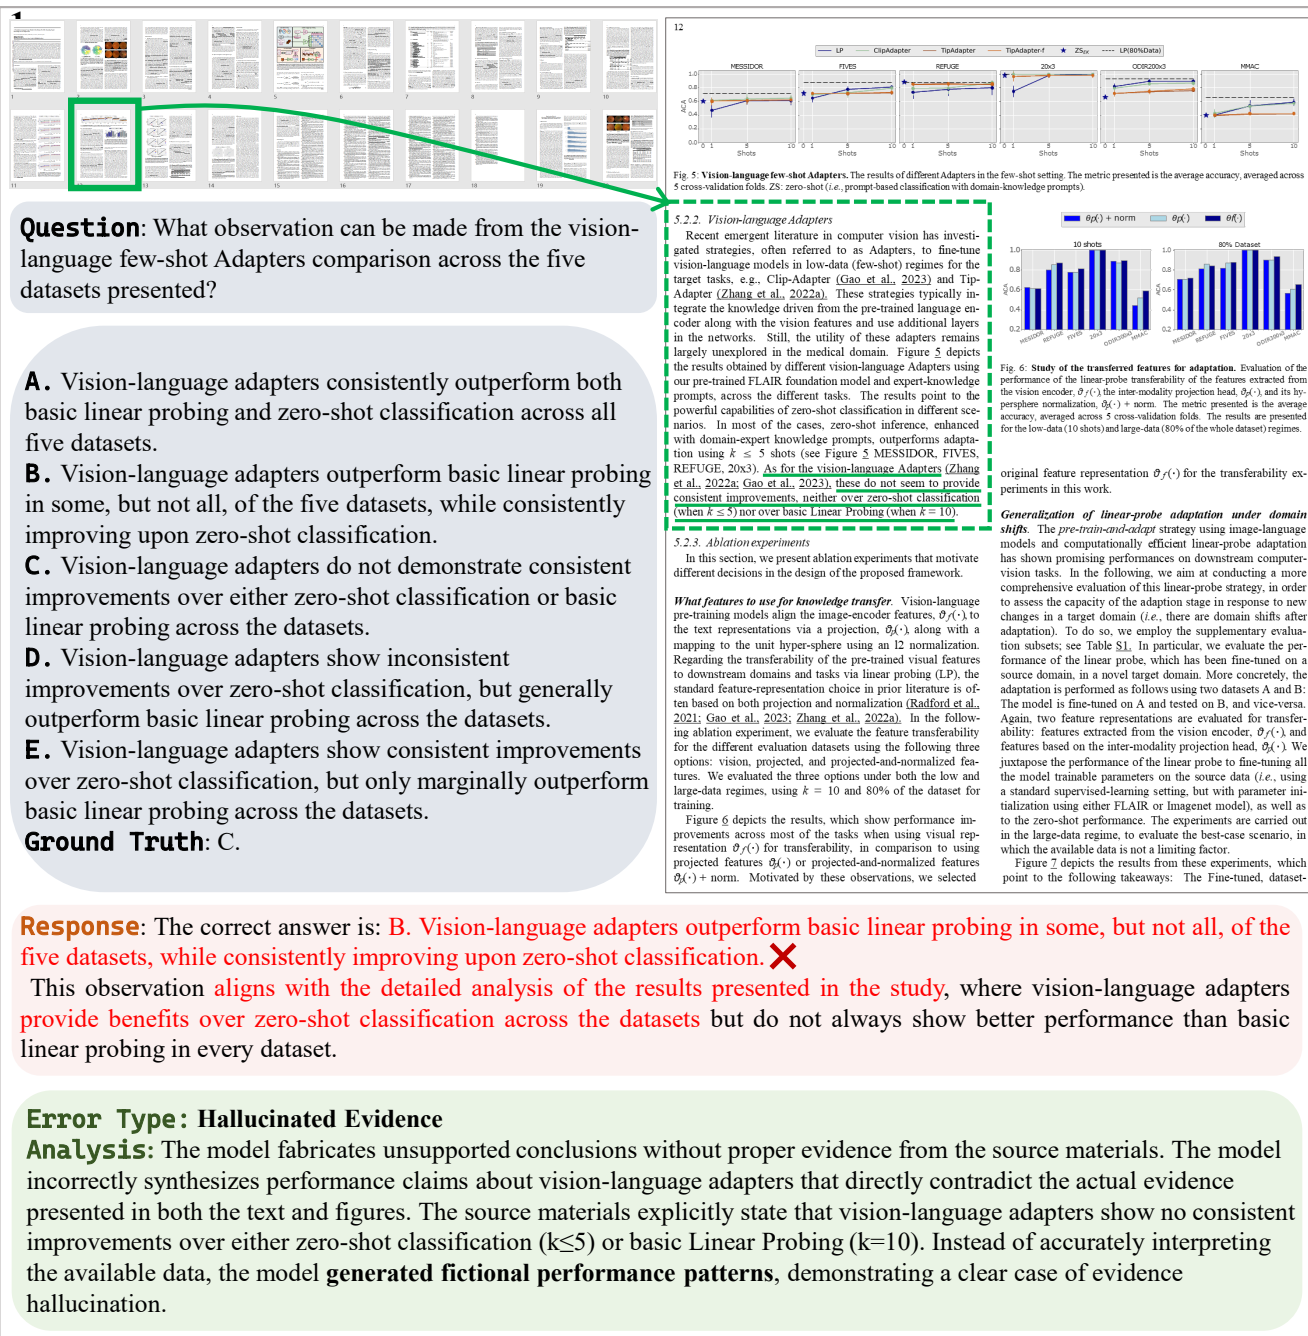

Figure S.15. Illustration of a Hallucinated Evidence Error Case. The figure demonstrates how the model fabricates unsupported conclusions about vision-language adapter performance, contradicting the evidence highlighted in green from the source materials.



The screenshot shows a web browser window with a search results page. The page title is "Molecular Biology of the Cell" by Alberts et al. The search results are displayed in a table with columns for Title, Author, and Date. The results are sorted by relevance. The first result is "Molecular Biology of the Cell" by Alberts et al., published in 2015. The second result is "Molecular Biology of the Cell" by Alberts et al., published in 2015. The third result is "Molecular Biology of the Cell" by Alberts et al., published in 2015. The fourth result is "Molecular Biology of the Cell" by Alberts et al., published in 2015. The fifth result is "Molecular Biology of the Cell" by Alberts et al., published in 2015. The sixth result is "Molecular Biology of the Cell" by Alberts et al., published in 2015. The seventh result is "Molecular Biology of the Cell" by Alberts et al., published in 2015. The eighth result is "Molecular Biology of the Cell" by Alberts et al., published in 2015. The ninth result is "Molecular Biology of the Cell" by Alberts et al., published in 2015. The tenth result is "Molecular Biology of the Cell" by Alberts et al., published in 2015.

Figure S.16. Illustration of an Incomplete Evidence Error Case. The model correctly identifies the two-stage nature of visual pre-training but overlooks crucial timing information, considering only the second stage duration (36 hours) while missing the first stage duration (10 hours).

### III. Perceptual Error: Case 1

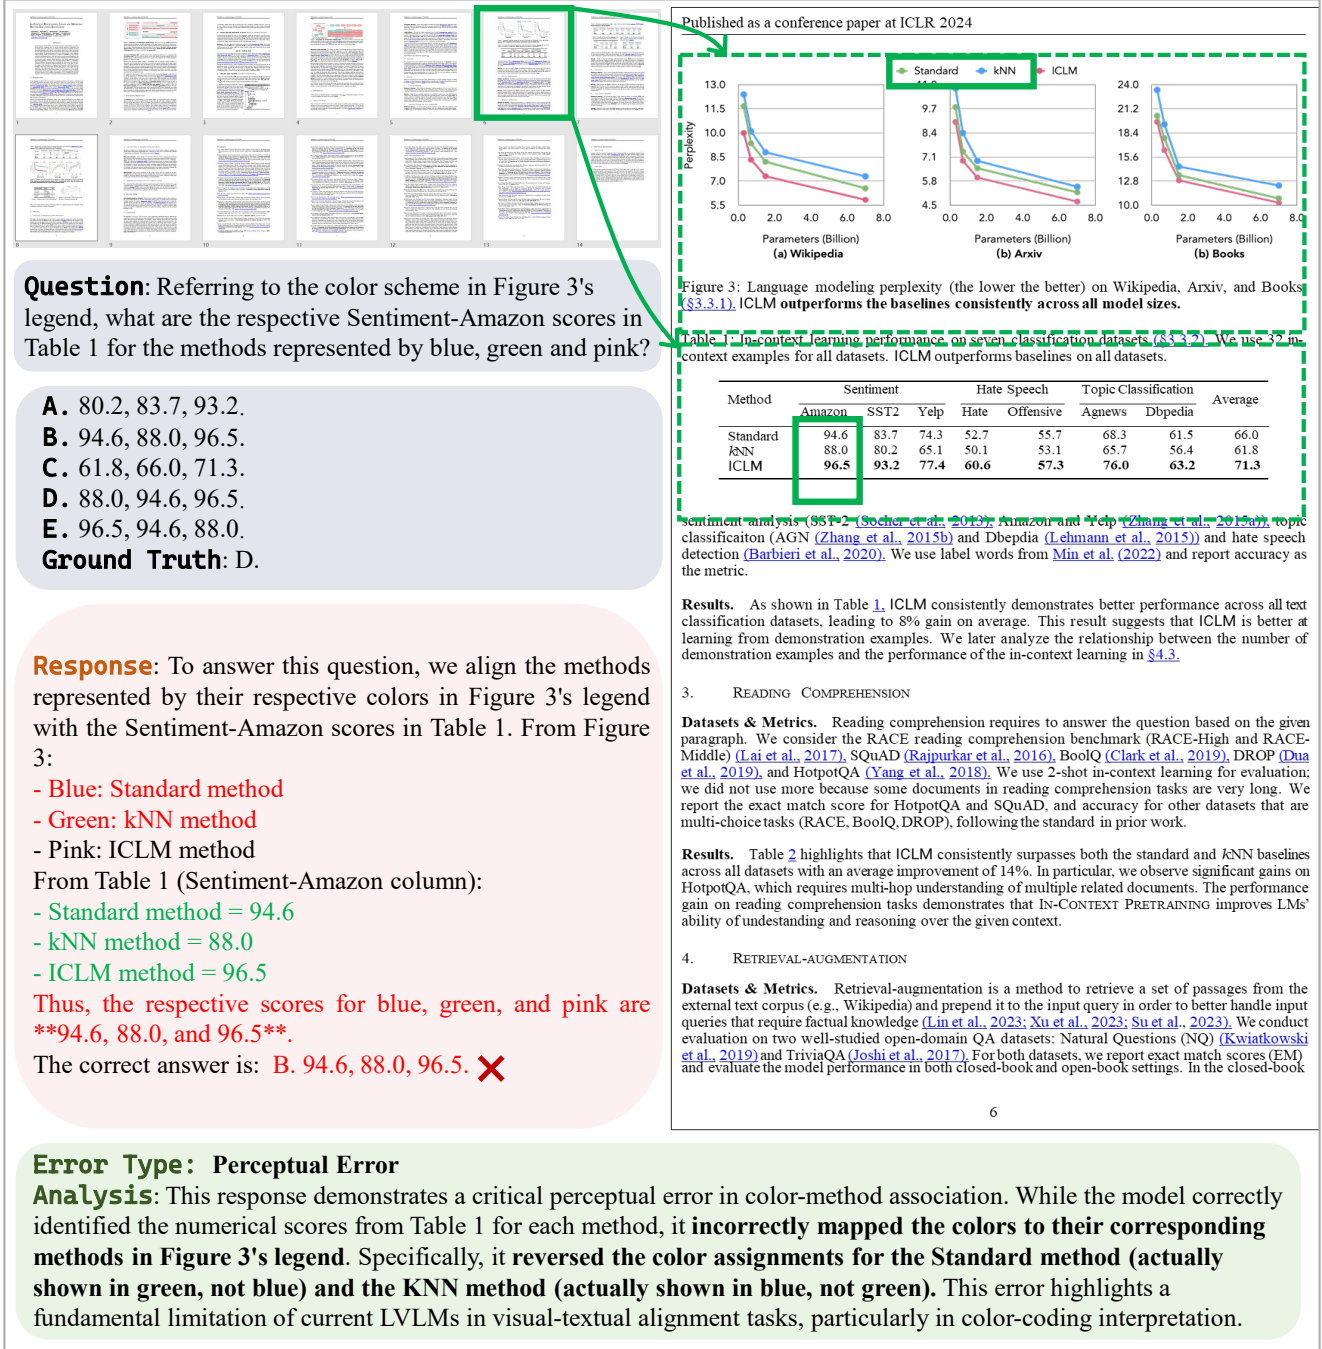

Figure S.17. Illustration of a Perceptual Error Case. The figure demonstrates how the model correctly identifies numerical scores but incorrectly maps color codes to methods, mismatching the blue and green representations in the legend despite clear visual evidence.

#### IV. Extractor Error: Case 1

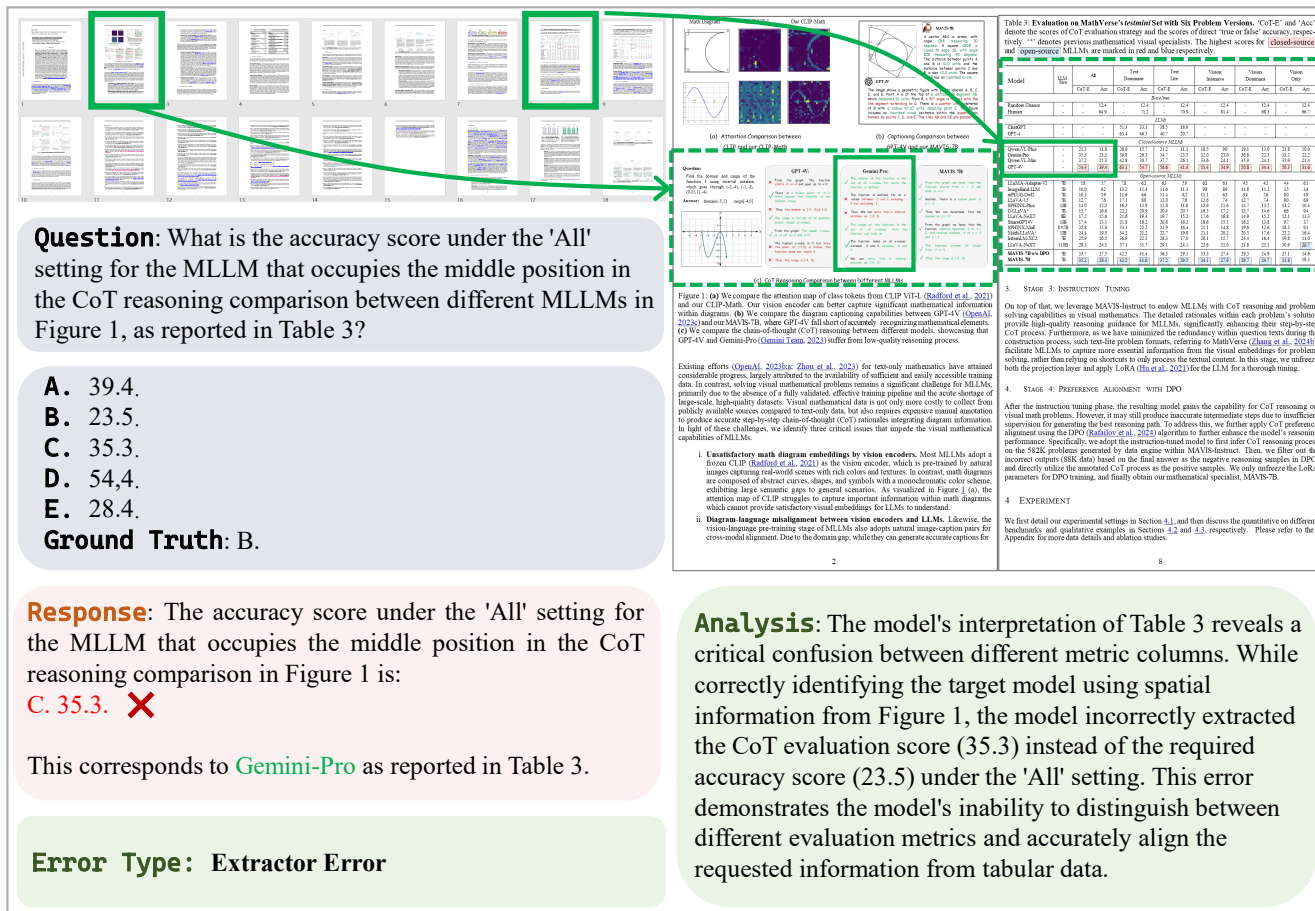

Figure S.18. Illustration of an Extractor Error Case. The figure demonstrates how the model confuses different metric columns in Table 3, extracting the CoT evaluation score (35.3) instead of the correct accuracy score (23.5) despite accurately identifying the target model from spatial information.



## V. Reasoning Error: Case 1

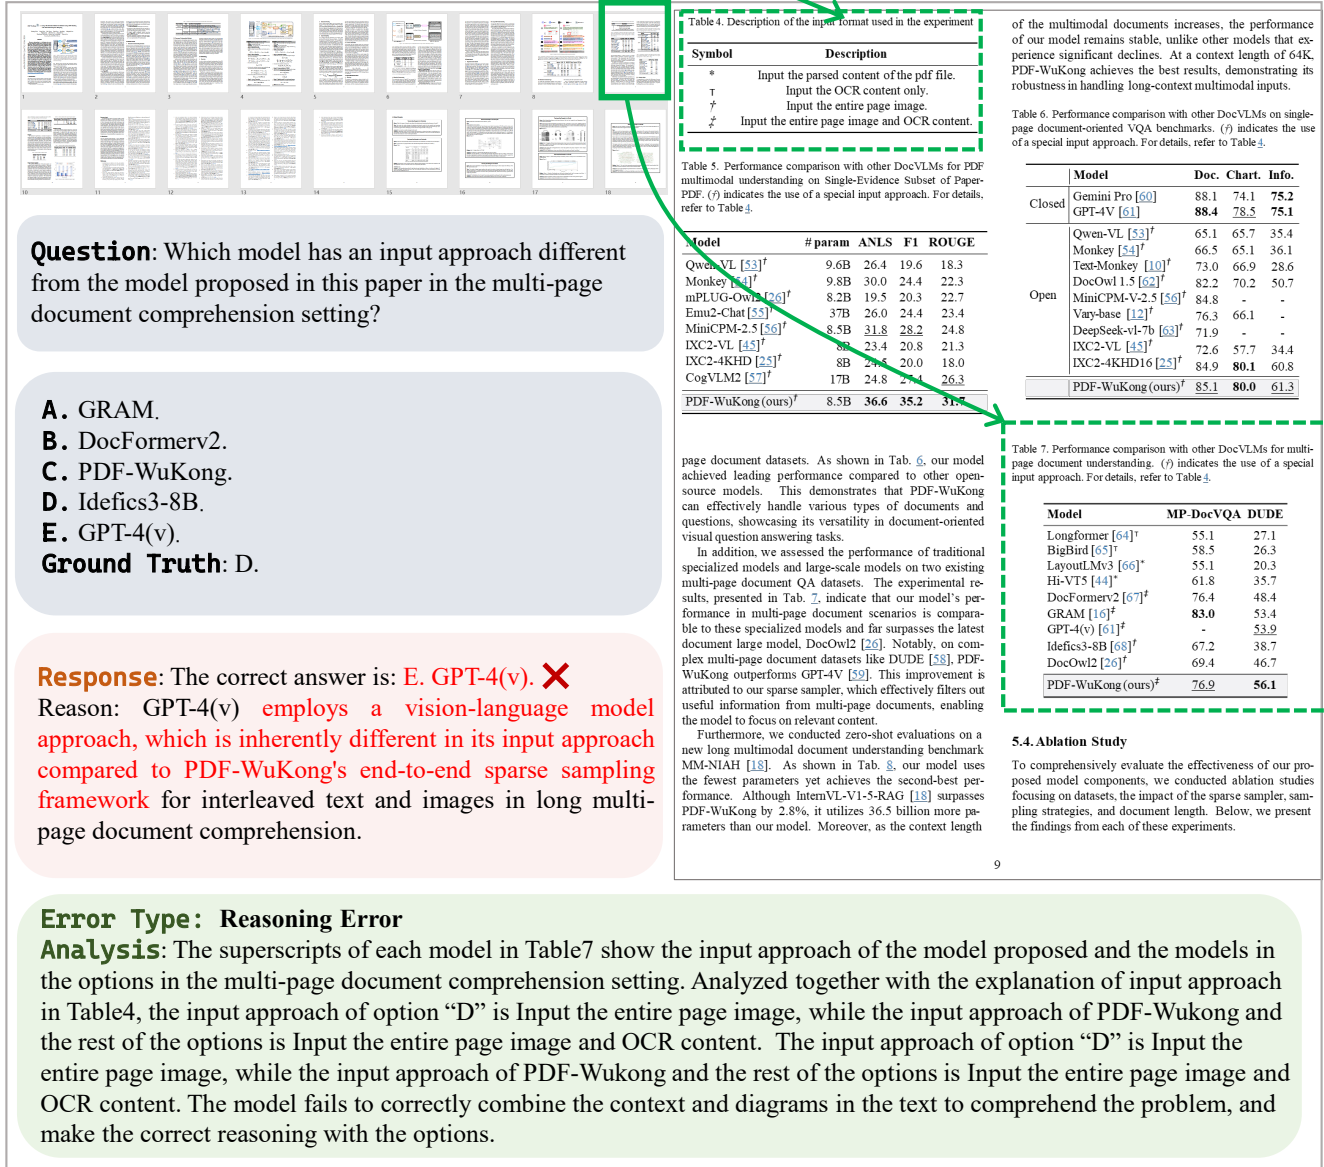

Figure S.19. Illustration of a Reasoning Error Case. The figure demonstrates how the model fails to correctly interpret input approach differences between models despite clear evidence from Table 1 and Table 7, misidentifying GPT-4(v) as having a distinct approach from other models.

Figure S.20. Illustration of an Irrelevant Answer Case. The figure demonstrates how the model misinterprets the question target, calculating the percentage of papers passing the pipeline (54,557/75,506) instead of the required percentage of high-quality image-text pairs (37,607/202,760), revealing a fundamental misunderstanding of the dataset definition

## VII. Matching Error: Case 1

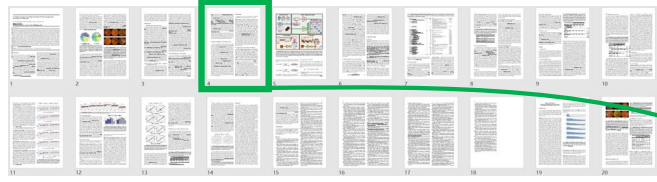

**Question:** According to the paper, which of the following statements about the text description defined before section '3.1' is True?

- A. The text descriptions are designed to provide a one-to-one correspondence between each categorical label and a unique textual representation.
  - B. A single categorical label may correspond to several text descriptions, each describing a different feature of the image.
  - C. A single text description may correspond to multiple categorical labels, as various diseases can exhibit similar symptoms..
  - D. The text descriptions are generated by a Large Language Model that has been fine-tuned on extensive medical imaging data..
  - E. The text descriptions are annotated by a several invited expert radiologists to ensure accurate representations.
- Ground Truth:** B.

**Response:** The correct answer is: B. A single categorical label may correspond to several text descriptions, each describing a different feature of the image. **x?**

**Explanation:** According to the text, the authors define text descriptions that encode domain knowledge for each disease. A single categorical label can correspond to multiple text descriptions, as these descriptions aim to capture various features, hierarchies, and dependencies of the related pathology.

### Error Type: Matching Error

**Analysis:** The model correctly made choice "B", but due to a matching error in the Rule-based methods, the correct choice was not successfully extracted from the model's answer, resulting in a matching error.

2023), or attribute descriptions (Menon and Vondrick, 2023) for prompt-based inference, using pre-trained question-answering models to describe the shape and color of the target conditions (Qin et al., 2023). Other works have focused on the pre-training stage, generating domain-specialized VLP models such as ConVirt (Zhang et al., 2022b), PubMedCLIP (Eslami et al., 2022a), GLoriA (Huang et al., 2021b), MedCLIP (Wang et al., 2022c) or MedKlip (Wu et al., 2023), among others (Windor et al., 2023; Wang et al., 2022a; Müller et al., 2022; Chen et al., 2022b). One of the main challenges of such pre-training lies in the low prevalence of text-based supervision on publicly available datasets. To alleviate this issue, MedCLIP incorporated categorically-labeled samples through label-space alignment (Wang et al., 2022a). Other methods have taken profit from well-established domain tools in radiology such as UMLS and RadGraph to augment the available text reports (Chen et al., 2022b; Wu et al., 2023).

Despite these recent advances in the development of vision-language pre-training strategies in medical imaging, the use of categorically-labeled datasets has been overlooked. In this work, we argue and show that such supervision could still be exploited to train powerful vision-language representations, by encoding expert's domain knowledge into text supervision.

2.4. Expert knowledge-driven models of fundus images

The idea of integrating domain knowledge into deep learning for medical image analysis is not new, and has triggered interest in the recent literature (Xie et al., 2021). In particular, domain-specific, expert knowledge (EK) from clinicians could be retrieved to highlight areas of interest, relevant features, anatomical priors, or inter-disease dependencies and hierarchies. In retinal imaging, the expert's knowledge has been integrated in various ways. For instance, Giancardo et al. (2012) first segmented the exudates, which served as a proxy for macular edema detection. Similarly, several other strategies train attention modules to enhance local lesions, which act as surrogates for disease classification. Closely related to our work, we have identified several categories, which include: using pixel-level annotated lesions for AMD staging (Fang et al., 2019), weakly-supervised strategies based on the relationships between diabetic retinopathy and diabetic macular edema (Xiaomeng et al., 2020), or disentangling disease-specific saliency maps for diabetic retinopathy grading (Sun et al., 2021). In addition, expert knowledge for glaucoma detection in fundus images is usually integrated by cropping the optic-disk area as an initial step before classification (Diaz-Pinto et al., 2019; de Vente et al., 2024). Unlike this existing literature, we study the use of well-established expert knowledge on retinal image analysis via vision-language pre-training, which has been largely overlooked in the context of foundation models. Concretely, we propose a contrastive image-text pre-training, which incorporates relevant features, hierarchies, and relationships between the classes as well as information on the regions of interest characterizing the target diseases, in the form of descriptive textual prompts, paired with the corresponding images.

3. Methodology

Fig. 3 depicts an overview of our framework. We introduce each methodological component formally in the following.

**Problem setup.** Let us define an assembly dataset,  $D_T$ , which contains  $N$  samples gathered from different publicly available fundus image datasets, including heterogeneous sources and findings. For each sample, we build a multi-modal triplet including an image, a categorical label and a text description:  $D_T = \{(X_i, y_i, T_i)\}_{i=1}^N$ .  $X_i \in \mathbb{R}^{D_x}$  denotes a fundus 2D image, with  $\Omega_i$  its spatial domain,  $y_i \in \{1, \dots, C\}$  is a label among the  $C$  unique categories in the assembly dataset, and  $T_i \in \mathbb{T}$  is a text description associated with the label. Figure 2 provides a few examples of categorical labels, such as DME, and the associated text descriptions encoding domain knowledge, e.g., "hard exudates involving the center of the macula". Such textual domain knowledge could be derived from the relevant clinical literature (Garner and Ashton, 1979) and/or from community standards (Wilkinson et al., 2023). Table S4 provides a comprehensive list of the correspondences between the categorical labels and textual domain-knowledge descriptions, which we compiled from the relevant clinical literature, to build our foundation model of the retina. Note that a single categorical label may correspond to several text descriptions, each describing a different finding or feature in the image. The objective of our vision-language pre-training is to provide a powerful multi-modal model capable of learning a feature representation space where samples are aligned across the three modalities: images, categories, and text.

3.1. Aligning images, labels and domain-knowledge text

Our multi-modal pre-training integrates vision and language encoders. Let  $\theta = \{\theta_I(\cdot), \theta_L(\cdot)\}$  denotes the vision encoder, with  $\theta_I(\cdot)$  a feature extractor and  $\theta_L(\cdot)$  a projection head. The feature extractor  $\theta_I(\cdot)$  yields a feature representation  $\mathbf{u} \in \mathbb{R}^{D_u}$ :  $\mathbf{u} = \theta_I(X_i)$  of an input image  $X_i$ , with  $D_u$  the dimension of the visual feature space. Analogously, let  $\phi = \{\phi_T(\cdot), \phi_C(\cdot)\}$  denotes the text encoder,  $\phi_T(\cdot)$  being a feature extractor and  $\phi_C(\cdot)$  a projection head. The feature extractor  $\phi_T(\cdot)$  provides an embedding  $\mathbf{v} \in \mathbb{R}^{D_v}$ :  $\mathbf{v}_j = \phi_T(T_j)$  of an input text  $T_j$ , with  $D_v$  denoting the dimension of the space of text features. Each of the projection heads,  $\theta_L(\cdot)$  and  $\phi_C(\cdot)$ , maps the independent modality representations into a joint unit hyper-sphere space:  $\mathbf{u} = \frac{\mathbf{u}}{\|\mathbf{u}\|}$  and  $\mathbf{v} = \frac{\mathbf{v}}{\|\mathbf{v}\|}$ . In this normalized space, the similarity between image  $X_i$  and text description  $T_j$  is evaluated by the cosine similarity:  $\mathbf{u}^T \mathbf{v}_j$ , where  $T$  denotes the transpose operator.

The objective consists of learning feature representations that minimize the distances between paired image and text descriptions while maximizing the distances between unpaired samples. We build image-text pairs from the available categorical label information, thereby encouraging samples belonging to the same category to have close feature representations, in both the image and text domains. More formally, let  $B$  denote a batch containing a set of images  $\{X_i\}_{i \in B}$ , and a set of text descriptions  $\{T_j\}_{j \in T_B}$ , where  $X_B \subset \{1, \dots, N\}$  denotes the set of indices of the images in  $B$ , and  $T_B \subset \{1, \dots, N\}$  the set of indices of the

Figure S.21. Illustration of a Matching Error Case.
